# Supplementary material for: Discovery and characterization of differentially expressed soybean miRNAs and their targets during soybean mosaic virus infection unveils novel insight into Soybean-SMV interaction
Source: BMC Genomics. 2022 Mar 2;23:171. doi: 10.1186/s12864-022-08385-z (PMC8889786; doi:10.1186/s12864-022-08385-z)
Supplement: Supplementary file 2 — Additional file 2: Table S1. Summary of read details from resistant and susceptible lines. [file 12864_2022_8385_MOESM2_ESM.xlsx]

## Sheet: Sheet1
Table S1 Summary of read details from resistant and susceptible lines
Samples	Total Reads	Mapped Reads	Mapped reads(+)	Mapped reads(-)
R-0-1	4518482	1,525,260(33.76%)	1,162,573(25.73%)	362,687(8.03%)
R-0-2	3282279	947,911(28.88%)	718,513(21.89%)	229,398(6.99%)
R-0-3	3458001	1,323,991(38.29%)	1,026,362(29.68%)	297,629(8.61%)
R-7-1	5659153	2,136,413(37.75%)	1,712,474(30.26%)	423,939(7.49%)
R-7-2	3386437	1,240,760(36.64%)	987,916(29.17%)	252,844(7.47%)
R-7-3	3751939	1,504,628(40.10%)	1,133,249(30.20%)	371,379(9.90%)
R-14-1	4924124	1,736,920(35.27%)	1,339,848(27.21%)	397,072(8.06%)
R-14-2	3455795	1,509,916(43.69%)	1,141,116(33.02%)	368,800(10.67%)
R-14-3	4105571	1,453,391(35.40%)	1,089,068(26.53%)	364,323(8.87%)
S-0-1	3222418	991,048(30.75%)	757,275(23.50%)	233,773(7.25%)
S-0-2	4567278	1,558,326(34.12%)	1,208,546(26.46%)	349,780(7.66%)
S-0-3	5997791	1,668,930(27.83%)	1,269,894(21.17%)	399,036(6.65%)
S-7-1	6271431	2,041,690(32.56%)	1,459,683(23.28%)	582,007(9.28%)
S-7-2	8141712	4,372,916(53.71%)	3,028,729(37.20%)	1,344,187(16.51%)
S-7-3	7913287	4,120,651(52.07%)	2,903,626(36.69%)	1,217,025(15.38%)
S-14-1	11615970	6,249,425(53.80%)	4,587,022(39.49%)	1,662,403(14.31%)
S-14-2	8089029	3,980,389(49.21%)	2,885,240(35.67%)	1,095,149(13.54%)
S-14-3	6700198	2,868,797(42.82%)	2,155,977(32.18%)	712,820(10.64%)
Notes:
Sample：The ID of the samples
Total Reads：The number of unannotated reads used for alignment with the reference genome
Mapped_Reads：Clean Reads aligned to the reference genome
Mapped_reads(+):The number of the clean reads compared to the positive chain
Mapped_reads(-):The number of the clean reads compared to the negative chain
