# Supplementary material for: Discovery and characterization of differentially expressed soybean miRNAs and their targets during soybean mosaic virus infection unveils novel insight into Soybean-SMV interaction
Source: BMC Genomics. 2022 Mar 2;23:171. doi: 10.1186/s12864-022-08385-z (PMC8889786; doi:10.1186/s12864-022-08385-z)
Supplement: Supplementary file 4 — Additional file 4: Table S2. Classification of miRNAs family details. [file 12864_2022_8385_MOESM4_ESM.xlsx]

## Sheet: Family_In_miR
Table S2 Classification of miRNAs family details
#miRNA	Family
aau-miR172	MIR172
aau-miR396	MIR396
aly-miR157b-3p	MIR156
aly-miR157b-5p	MIR156
aly-miR166c-3p	MIR166
aly-miR166c-5p	MIR166
aly-miR166d-3p	MIR166
aly-miR166d-5p	MIR166
aly-miR166g-3p	MIR166
aly-miR166g-5p	MIR166
aly-miR172e-3p	MIR172
aly-miR396a-3p	MIR396
aly-miR396a-5p	MIR396
amg-miR396	MIR396
ata-miR167c-5p	MIR167_1
ata-miR172b-3p	MIR172
ata-miR172b-5p	MIR172
ath-miR166c	MIR166
ath-miR166d	MIR166
ath-miR166g	MIR166
ath-miR172e-3p	MIR172
ath-miR396a-3p	MIR396
ath-miR396a-5p	MIR396
atr-miR396c	MIR396
bdi-miR166f	MIR166
bdi-miR167d-3p	MIR167_1
bdi-miR167d-5p	MIR167_1
bdi-miR167f	MIR167_1
bna-miR166d	MIR166
bna-miR172b	MIR172
bna-miR172c	MIR172
bra-miR172d-3p	MIR172
ccl-miR396	MIR396
cme-miR156b	MIR156
cme-miR164c	MIR164
cme-miR166e	MIR166
cme-miR166g	MIR166
cme-miR166h	MIR166
cme-miR167d	MIR167_1
cme-miR167f	MIR167_1
cme-miR172c	MIR172
cme-miR390a	MIR390
cme-miR393a	MIR393
cme-miR393c	MIR393
cme-miR396b	MIR396
crt-miR166a	MIR166
csi-miR166b-3p	MIR166
csi-miR166b-5p	MIR166
csi-miR167c-3p	MIR167_1
csi-miR167c-5p	MIR167_1
csi-miR171b-3p	MIR171_2
csi-miR171b-5p	MIR171_2
csi-miR390b-5p	MIR390
csi-miR393b-5p	MIR393
csi-miR394a	MIR394
csi-miR396f-3p	MIR396
csi-miR396f-5p	MIR396
dpr-miR167c	MIR167_1
ghr-miR390a	MIR390
ghr-miR390b	MIR390
ghr-miR390c	MIR390
ghr-miR396a	MIR396
ghr-miR396b	MIR396
ghr-miR399d	MIR399
gma-miR10186d	MIR8001
gma-miR10186f	MIR8001
gma-miR10186g	MIR8001
gma-miR10186i	MIR8001
gma-miR10188	MIR7484
gma-miR10193c	MIR1863
gma-miR10193d	MIR1863
gma-miR10194	MIR857
gma-miR10198	MIR7991
gma-miR10199	MIR1878
gma-miR10405a	MIR1122
gma-miR10405b	MIR1122
gma-miR10405e	MIR1122
gma-miR10406a	MIR166
gma-miR10408	MIR477
gma-miR10409	MIR9486
gma-miR10412	MIR395
gma-miR10414	MIR1222
gma-miR10421	MIR8552
gma-miR10424a	MIR5780
gma-miR10424b	MIR5780
gma-miR10424c	MIR5780
gma-miR10427a	MIR482
gma-miR10427b	MIR482
gma-miR10435	MIR447
gma-miR1507a	MIR1507
gma-miR1507b	MIR1507
gma-miR1508a	MIR1508
gma-miR1508b	MIR1508
gma-miR1508c	MIR1508
gma-miR1509a	MIR1509
gma-miR1509b	MIR1509
gma-miR1510a-3p	MIR1510
gma-miR1510a-5p	MIR1510
gma-miR1510b-3p	MIR1510
gma-miR1510b-5p	MIR1510
gma-miR1511	MIR1511
gma-miR1512a-3p	MIR1512
gma-miR1512a-5p	MIR1512
gma-miR1513a-5p	MIR1513
gma-miR1513b	MIR1513
gma-miR1514b-3p	MIR1514
gma-miR1514b-5p	MIR1514
gma-miR1515a	MIR1515
gma-miR1516a-3p	MIR1516
gma-miR1516a-5p	MIR1516
gma-miR1519	MIR8743
gma-miR1520c	MIR1520
gma-miR1520f-3p	MIR1520
gma-miR1520f-5p	MIR1520
gma-miR1520h	MIR1520
gma-miR1520k	MIR1520
gma-miR1520l	MIR1520
gma-miR1520n	MIR1520
gma-miR1520o	MIR1520
gma-miR1520p	MIR1520
gma-miR1521b	MIR1520
gma-miR1523b	MIR1523
gma-miR1526	MIR4343
gma-miR1527	MIR476
gma-miR1532	MIR159
gma-miR156d	MIR156
gma-miR156i	MIR156
gma-miR156j	MIR156
gma-miR156l	MIR156
gma-miR156r	MIR156
gma-miR156t	MIR156
gma-miR159a-3p	MIR159
gma-miR159a-5p	MIR159
gma-miR159d	MIR159
gma-miR160b	MIR160
gma-miR162b	MIR162_2
gma-miR162c	MIR162_1
gma-miR164a	MIR164
gma-miR164b	MIR164
gma-miR164c	MIR164
gma-miR164d	MIR164
gma-miR164e	MIR164
gma-miR164f	MIR164
gma-miR164g	MIR164
gma-miR164i	MIR164
gma-miR164j	MIR164
gma-miR164k	MIR164
gma-miR166d	MIR166
gma-miR166e	MIR166
gma-miR166f	MIR166
gma-miR166h-3p	MIR166
gma-miR166h-5p	MIR166
gma-miR166i-3p	MIR166
gma-miR166i-5p	MIR166
gma-miR166k	MIR166
gma-miR166m	MIR166
gma-miR166n	MIR166
gma-miR166o	MIR166
gma-miR166q	MIR166
gma-miR166s	MIR166
gma-miR166t	MIR166
gma-miR166u	MIR166
gma-miR167a	MIR167_1
gma-miR167c	MIR167_1
gma-miR167d	MIR167_1
gma-miR167e	MIR167_1
gma-miR167g	MIR167_1
gma-miR167j	MIR167_1
gma-miR167l	MIR167_1
gma-miR169a	MIR169_2
gma-miR169b	MIR169_2
gma-miR169c	MIR169_2
gma-miR169d	MIR169_2
gma-miR169e	MIR169_2
gma-miR169h	MIR169_6
gma-miR169i-3p	MIR169_6
gma-miR169i-5p	MIR169_6
gma-miR169k	MIR169_2
gma-miR169l-3p	MIR169_2
gma-miR169l-5p	MIR169_2
gma-miR169m	MIR169_2
gma-miR169n-3p	MIR169_2
gma-miR169n-5p	MIR169_2
gma-miR169o	MIR169_6
gma-miR169p	MIR169_2
gma-miR169w	MIR169_2
gma-miR171a	MIR171_1
gma-miR171b-3p	MIR171_2
gma-miR171b-5p	MIR171_2
gma-miR171k-3p	MIR171_1
gma-miR171k-5p	MIR171_1
gma-miR171l	MIR171_1
gma-miR171m	MIR171_1
gma-miR171n	MIR171_1
gma-miR171o-3p	MIR171_1
gma-miR171o-5p	MIR171_1
gma-miR171q	MIR171_1
gma-miR171r	MIR171_2
gma-miR172f	MIR172
gma-miR172h-3p	MIR172
gma-miR172h-5p	MIR172
gma-miR172k	MIR172
gma-miR172l	MIR172
gma-miR2108a	MIR2108
gma-miR2108b	MIR2108
gma-miR2111a	MIR2111
gma-miR2111d	MIR2111
gma-miR2118a-3p	MIR2118
gma-miR2118a-5p	MIR482
gma-miR2118b-3p	MIR482
gma-miR2118b-5p	MIR482
gma-miR2606a	MIR2606
gma-miR319e	MIR159
gma-miR319g	MIR159
gma-miR319h	MIR159
gma-miR319i	MIR159
gma-miR319j	MIR159
gma-miR319k	MIR159
gma-miR319p	MIR319
gma-miR319q	MIR159
gma-miR3522	MIR3522
gma-miR390b-3p	MIR390
gma-miR390b-5p	MIR390
gma-miR390c	MIR390
gma-miR390d	MIR390
gma-miR390e	MIR390
gma-miR390g	MIR390
gma-miR391-5p	MIR3627
gma-miR391a-3p	MIR391
gma-miR393a	MIR393
gma-miR393e	MIR393
gma-miR393h	MIR393
gma-miR393i	MIR393
gma-miR393j	MIR393
gma-miR394a-3p	MIR394
gma-miR394a-5p	MIR394
gma-miR394b-3p	MIR394
gma-miR394b-5p	MIR394
gma-miR394d	MIR394
gma-miR394e	MIR394
gma-miR394f	MIR394
gma-miR395a	MIR395
gma-miR395c	MIR395
gma-miR395l	MIR395
gma-miR395m	MIR395
gma-miR396b-3p	MIR396
gma-miR396b-5p	MIR396
gma-miR396c	MIR396
gma-miR396d	MIR396
gma-miR396f	MIR396
gma-miR396g	MIR396
gma-miR396h	MIR396
gma-miR396i-3p	MIR396
gma-miR396i-5p	MIR396
gma-miR396k-3p	MIR396
gma-miR396k-5p	MIR396
gma-miR398d	MIR398
gma-miR399a	MIR399
gma-miR399b	MIR399
gma-miR399h	MIR399
gma-miR399i	MIR399
gma-miR399j	MIR399
gma-miR399k	MIR399
gma-miR399m	MIR399
gma-miR403a	MIR403
gma-miR403b	MIR403
gma-miR408a-3p	MIR408
gma-miR408a-5p	MIR408
gma-miR4343a	MIR4343
gma-miR4347	MIR4347
gma-miR4348b	MIR4348
gma-miR4348c	MIR4348
gma-miR4349-3p	MIR4349
gma-miR4349-5p	MIR4349
gma-miR4352a	MIR6224
gma-miR4352b	MIR4352
gma-miR4354	MIR4354
gma-miR4356	MIR4356
gma-miR4359b	MIR4359
gma-miR4361	MIR4347
gma-miR4363	MIR7493
gma-miR4364a	MIR4364
gma-miR4364b	MIR4364
gma-miR4367	MIR7492
gma-miR4368b	MIR4368
gma-miR4370	MIR1862
gma-miR4371a	MIR4371
gma-miR4374b	MIR4374
gma-miR4377	MIR4371
gma-miR4380b	MIR4380
gma-miR4383	MIR4354
gma-miR4384	MIR397
gma-miR4387a	MIR4387
gma-miR4387b	MIR4387
gma-miR4387c	MIR4387
gma-miR4387e	MIR4387
gma-miR4388	MIR5741
gma-miR4401a	MIR4368
gma-miR4401b	MIR4356
gma-miR4405	MIR4352
gma-miR4405b	MIR4352
gma-miR4413a	MIR400
gma-miR4414a-3p	MIR4414
gma-miR4414a-5p	MIR4414
gma-miR4415a-3p	MIR4415
gma-miR4415a-5p	MIR4415
gma-miR4415b-3p	MIR4415
gma-miR4415b-5p	MIR4415
gma-miR482a-3p	MIR482
gma-miR482a-5p	MIR482
gma-miR482b-3p	MIR482
gma-miR482b-5p	MIR482
gma-miR482e	MIR482
gma-miR5030	MIR5998
gma-miR5032	MIR5568
gma-miR5035-5p	MIR6462
gma-miR5036	MIR477
gma-miR5037a	MIR5037
gma-miR5037b	MIR5037
gma-miR5037c	MIR5037
gma-miR5037d	MIR5037
gma-miR5038a	MIR5038
gma-miR5038b	MIR5038
gma-miR5042-3p	MIR166
gma-miR5042-5p	MIR167_1
gma-miR5225	MIR5225
gma-miR530a	MIR530
gma-miR530d	MIR530
gma-miR5368	MIR9408
gma-miR5377	MIR4352
gma-miR5379	MIR4997
gma-miR5380a	MIR5380
gma-miR5559	MIR5559
gma-miR5671b	MIR5671
gma-miR5673	MIR1023
gma-miR5674b	MIR5674
gma-miR5678	MIR6023
gma-miR5764	MIR5224
gma-miR5770c	MIR5770
gma-miR5774a	MIR5774
gma-miR5775	MIR1516
gma-miR5778	MIR399
gma-miR5780d	MIR5780
gma-miR5786	MIR3627
gma-miR862b	MIR862_2
gma-miR9731	MIR166
gma-miR9737	MIR1313
gma-miR9738	MIR902
gma-miR9739	MIR5303
gma-miR9757	MIR5070
gma-miR9762	MIR7984
gma-miR9763	MIR869
gma-miR9764	MIR4349
gma-miR9767	MIR482
gra-miR157b	MIR156
gra-miR167a	MIR167_1
gra-miR167b	MIR167_1
gso-miR1507a	MIR1507
gso-miR1507b	MIR1507
gso-miR1508a	MIR1508
gso-miR1509a	MIR1509
gso-miR1510a	MIR1510
gso-miR1510b	MIR1510
gso-miR167a	MIR167_1
gso-miR2218	MIR2118
gso-miR3522a	MIR3522
gso-miR3522b	MIR3522
gso-miR482a	MIR482
lja-miR396	MIR396
lus-miR156b	MIR156
lus-miR156c	MIR156
lus-miR156i	MIR156
lus-miR166e	MIR166
lus-miR167b	MIR167_1
lus-miR171a	MIR171_1
lus-miR172b	MIR172
lus-miR172h	MIR172
lus-miR393a	MIR393
lus-miR393b	MIR393
lus-miR393c	MIR393
lus-miR393d	MIR393
lus-miR396c	MIR396
mdm-miR167b	MIR167_1
mdm-miR167e	MIR167_1
mdm-miR172a	MIR172
mdm-miR172c	MIR172
mdm-miR172d	MIR172
mdm-miR172f	MIR172
mdm-miR172m	MIR172
mdm-miR172n	MIR172
mdm-miR390b	MIR390
mdm-miR390c	MIR390
mdm-miR390d	MIR390
mdm-miR393g	MIR393
mdm-miR393h	MIR393
mdm-miR395a	MIR395
mdm-miR395c	MIR395
mdm-miR395e	MIR395
mdm-miR395f	MIR395
mdm-miR396a	MIR396
mdm-miR396b	MIR396
mdm-miR396c	MIR396
mdm-miR396d	MIR396
mdm-miR396e	MIR396
mes-miR166h	MIR166
mes-miR167a	MIR167_1
mes-miR169a	MIR169_2
mes-miR390b	MIR390
mes-miR393a	MIR393
mes-miR393c	MIR393
mes-miR396a	MIR396
mes-miR396e	MIR396
mes-miR477i	MIR477
mtr-miR156e	MIR156
mtr-miR164b	MIR164
mtr-miR166b	MIR166
mtr-miR166f	MIR166
mtr-miR166g-3p	MIR166
mtr-miR166g-5p	MIR166
mtr-miR167a	MIR167_1
mtr-miR169k	MIR169_6
mtr-miR172c-3p	MIR172
mtr-miR172c-5p	MIR172
mtr-miR390	MIR390
mtr-miR393b-3p	MIR393
mtr-miR393b-5p	MIR393
mtr-miR395a	MIR395
mtr-miR396a-3p	MIR396
mtr-miR396a-5p	MIR396
mtr-miR396b-3p	MIR396
mtr-miR396b-5p	MIR396
mtr-miR398b	MIR398
mtr-miR399l	MIR399
mtr-miR399p	MIR399
mtr-miR4414a-3p	MIR4414
mtr-miR4414a-5p	MIR4414
nta-miR162b	MIR162_2
nta-miR166g	MIR166
nta-miR167a	MIR167_1
nta-miR167b	MIR167_1
nta-miR167c	MIR167_1
nta-miR172c	MIR172
nta-miR172d	MIR172
nta-miR172e	MIR172
nta-miR172f	MIR172
nta-miR172g	MIR172
nta-miR319a	MIR159
nta-miR394	MIR394
nta-miR395a	MIR395
nta-miR395b	MIR395
nta-miR395c	MIR395
nta-miR396b	MIR396
nta-miR396c	MIR396
osa-miR166g-3p	MIR166
osa-miR172d-3p	MIR172
osa-miR172d-5p	MIR172
osa-miR396d	MIR396_2
pab-miR396g	MIR396
ppe-miR164b	MIR164
ppe-miR167a	MIR167_1
ppe-miR172b	MIR172
ppe-miR390	MIR390
ppe-miR393a	MIR393
ppe-miR395f	MIR395
ppe-miR399b	MIR399
ppt-miR166a	MIR166
ppt-miR166b	MIR166
ptc-miR164c	MIR164
ptc-miR166b	MIR166
ptc-miR166q	MIR166
ptc-miR172a	MIR172
ptc-miR319f	MIR319
ptc-miR393a-3p	MIR393
ptc-miR393a-5p	MIR393
ptc-miR393b-3p	MIR393
ptc-miR393b-5p	MIR393
ptc-miR393c	MIR393
ptc-miR396a	MIR396
ptc-miR396b	MIR396
ptc-miR396d	MIR396
ptc-miR396e-3p	MIR396
ptc-miR396e-5p	MIR396
ptc-miR399g	MIR399
ptc-miR530a	MIR530
rco-miR167a	MIR167_1
sbi-miR167c	MIR167_1
sbi-miR167i	MIR167_1
sly-miR162	MIR162_2
sly-miR166a	MIR166
sly-miR396b	MIR396
ssl-miR164a	MIR164
ssl-miR172	MIR172
stu-miR171e	MIR171_1
tcc-miR166b	MIR166
tcc-miR172c	MIR172
tcc-miR393a	MIR393
vun-miR162	MIR162_1
vvi-miR164a	MIR164
vvi-miR167a	MIR167_1
vvi-miR393b	MIR393
vvi-miR394a	MIR394
vvi-miR394c	MIR394
vvi-miR395g	MIR395
vvi-miR396b	MIR396
vvi-miR396c	MIR396
vvi-miR396d	MIR396
vvi-miR408	MIR408_2
zma-miR167h-3p	MIR167_1
zma-miR167h-5p	MIR167_1
novel_miR_100	MIR4374
novel_miR_103	MIR447
novel_miR_106	MIR5037
novel_miR_108	MIR4374
novel_miR_109	MIR5559
novel_miR_11	MIR2619
novel_miR_110	MIR4416
novel_miR_113	MIR4347
novel_miR_114	MIR7726
novel_miR_116	MIR6288
novel_miR_117	MIR3434
novel_miR_118	MIR482
novel_miR_119	MIR4352
novel_miR_120	MIR156
novel_miR_125	MIR6425
novel_miR_128	MIR159
novel_miR_131	MIR2593
novel_miR_132	MIR6140
novel_miR_133	MIR2670
novel_miR_135	MIR4374
novel_miR_14	MIR319
novel_miR_140	MIR7484
novel_miR_144	MIR159
novel_miR_145	MIR6146
novel_miR_146	MIR1888
novel_miR_147	MIR403
novel_miR_148	MIR4368
novel_miR_149	MIR4352
novel_miR_154	MIR3434
novel_miR_157	MIR6140
novel_miR_16	MIR4221
novel_miR_160	MIR8007
novel_miR_164	MIR395
novel_miR_166	MIR1122
novel_miR_169	MIR6140
novel_miR_17	MIR482
novel_miR_170	MIR403
novel_miR_174	MIR171_1
novel_miR_175	MIR6140
novel_miR_176	MIR4378
novel_miR_177	MIR4378
novel_miR_178	MIR168
novel_miR_180	MIR4374
novel_miR_181	MIR2118
novel_miR_183	MIR4378
novel_miR_185	MIR4343
novel_miR_188	MIR4352
novel_miR_190	MIR6459
novel_miR_192	MIR1512
novel_miR_197	MIR5267
novel_miR_198	MIR403
novel_miR_2	MIR395
novel_miR_200	MIR7504
novel_miR_201	MIR403
novel_miR_206	MIR397
novel_miR_210	MIR5079
novel_miR_211	MIR4352
novel_miR_213	MIR4352
novel_miR_22	MIR1122
novel_miR_224	MIR837
novel_miR_226	MIR5160
novel_miR_235	MIR5380
novel_miR_237	MIR159
novel_miR_238	MIR1862
novel_miR_239	MIR4368
novel_miR_245	MIR6140
novel_miR_247	MIR2873
novel_miR_256	MIR4352
novel_miR_26	MIR482
novel_miR_261	MIR5780
novel_miR_262	MIR4221
novel_miR_263	MIR5067
novel_miR_268	MIR4378
novel_miR_269	MIR4352
novel_miR_270	MIR4352
novel_miR_271	MIR829
novel_miR_274	MIR171_1
novel_miR_275	MIR156
novel_miR_276	MIR4374
novel_miR_278	MIR4352
novel_miR_280	MIR397
novel_miR_281	MIR394
novel_miR_283	MIR2109
novel_miR_284	MIR5780
novel_miR_285	MIR7484
novel_miR_286	MIR2109
novel_miR_289	MIR3434
novel_miR_29	MIR1122
novel_miR_295	MIR395
novel_miR_299	MIR171_1
novel_miR_301	MIR5037
novel_miR_302	MIR1516
novel_miR_303	MIR477
novel_miR_317	MIR395
novel_miR_322	MIR4352
novel_miR_323	MIR4378
novel_miR_324	MIR2108
novel_miR_326	MIR4374
novel_miR_328	MIR399
novel_miR_329	MIR2630
novel_miR_33	MIR530
novel_miR_330	MIR5225
novel_miR_332	MIR6146
novel_miR_334	MIR6158
novel_miR_336	MIR159
novel_miR_338	MIR2655
novel_miR_339	MIR403
novel_miR_340	MIR5037
novel_miR_341	MIR319
novel_miR_343	MIR160
novel_miR_345	MIR171_2
novel_miR_349	MIR5225
novel_miR_350	MIR1122
novel_miR_352	MIR4378
novel_miR_353	MIR477
novel_miR_354	MIR5037
novel_miR_362	MIR4378
novel_miR_366	MIR812
novel_miR_367	MIR5067
novel_miR_368	MIR4378
novel_miR_369	MIR1120
novel_miR_37	MIR4378
novel_miR_370	MIR2619
novel_miR_371	MIR846
novel_miR_372	MIR482
novel_miR_373	MIR398
novel_miR_374	MIR2111
novel_miR_377	MIR8038
novel_miR_38	MIR4352
novel_miR_382	MIR5185
novel_miR_384	MIR1122
novel_miR_387	MIR5267
novel_miR_389	MIR4359
novel_miR_39	MIR4374
novel_miR_390	MIR4352
novel_miR_397	MIR159
novel_miR_398	MIR1513
novel_miR_4	MIR482
novel_miR_40	MIR482
novel_miR_400	MIR5303
novel_miR_401	MIR4352
novel_miR_403	MIR846
novel_miR_404	MIR403
novel_miR_406	MIR160
novel_miR_408	MIR4352
novel_miR_41	MIR4243
novel_miR_410	MIR4378
novel_miR_412	MIR9783
novel_miR_416	MIR394
novel_miR_418	MIR4374
novel_miR_419	MIR4416
novel_miR_42	MIR8553
novel_miR_424	MIR403
novel_miR_425	MIR846
novel_miR_426	MIR8007
novel_miR_429	MIR403
novel_miR_430	MIR851
novel_miR_433	MIR7484
novel_miR_44	MIR159
novel_miR_440	MIR5037
novel_miR_445	MIR8007
novel_miR_446	MIR1520
novel_miR_448	MIR4368
novel_miR_451	MIR399
novel_miR_456	MIR399
novel_miR_459	MIR160
novel_miR_46	MIR161
novel_miR_460	MIR4374
novel_miR_465	MIR398
novel_miR_468	MIR482
novel_miR_469	MIR478
novel_miR_478	MIR1520
novel_miR_479	MIR4378
novel_miR_482	MIR1024
novel_miR_486	MIR482
novel_miR_51	MIR168
novel_miR_52	MIR4374
novel_miR_55	MIR4352
novel_miR_57	MIR394
novel_miR_6	MIR4378
novel_miR_60	MIR8552
novel_miR_61	MIR4352
novel_miR_62	MIR4374
novel_miR_64	MIR3434
novel_miR_66	MIR398
novel_miR_7	MIR4387
novel_miR_70	MIR2109
novel_miR_71	MIR6425
novel_miR_73	MIR160
novel_miR_79	MIR394
novel_miR_80	MIR397
novel_miR_82	MIR5303
novel_miR_84	MIR4352
novel_miR_87	MIR5780
novel_miR_95	MIR1122
novel_miR_99	MIR395
Note:
Column 1 : Represents the miRNA name
Column 2 : represents the family classification of the miRNA
